# Supplementary material for: Synthesis of the oxysterol, 24(S), 25-epoxycholesterol, parallels cholesterol production and may protect against cellular accumulation of newly-synthesized cholesterol
Source: Springer Nature journal article supplement (doi:10.1186/1476-511x-6-10), 2007-04-05
Supplement: Additional file 1 [file 1476-511x-6-10-s1.pdf]

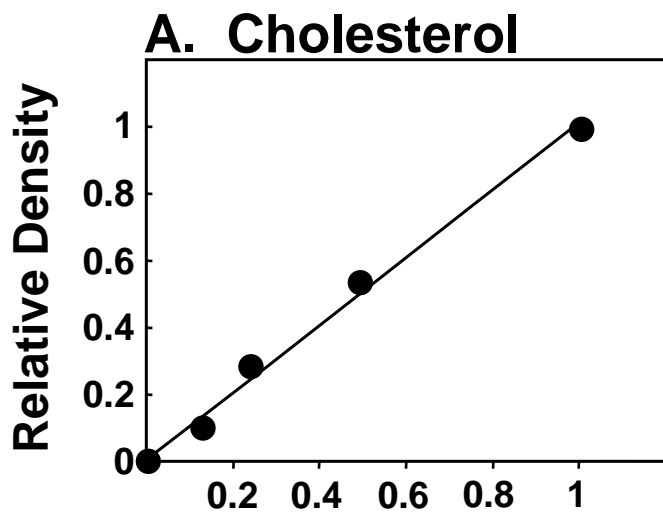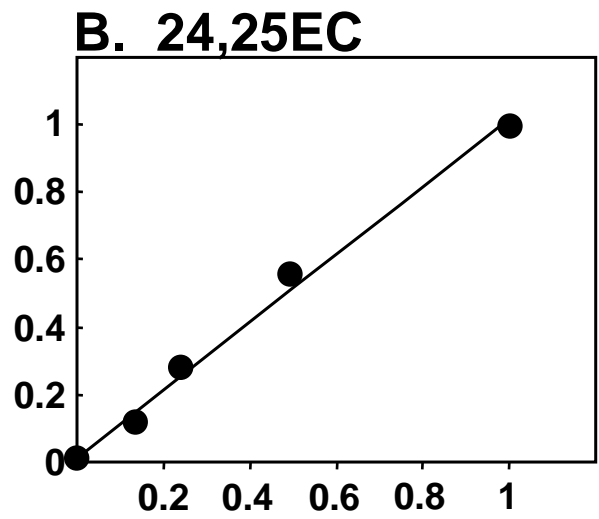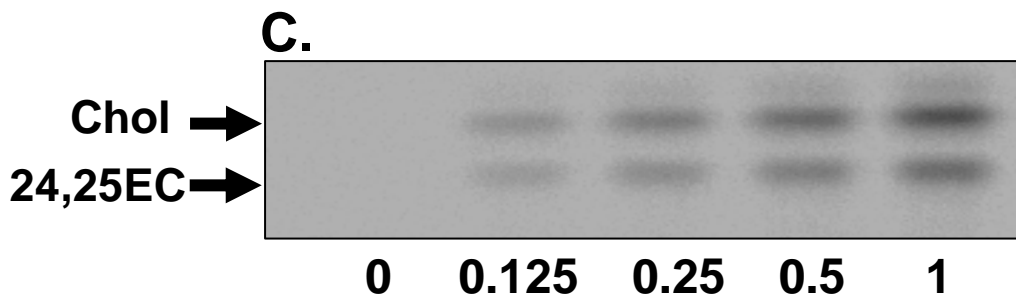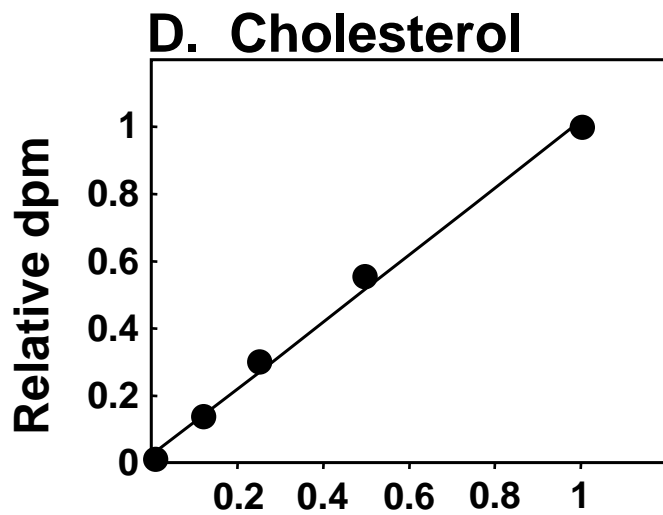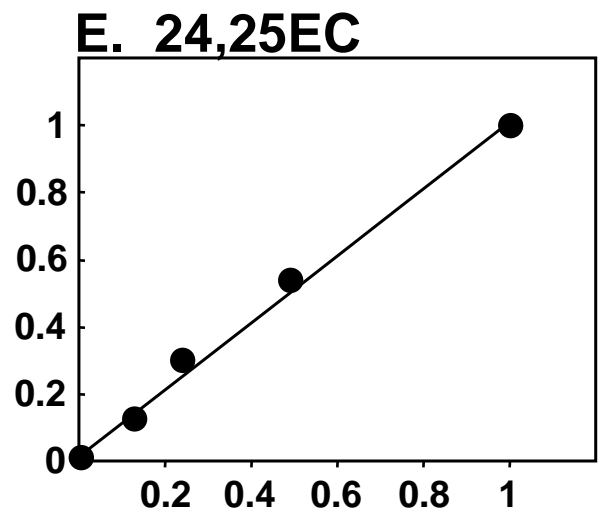

Relative Concentration
